# Supplementary material for: Protective Role of Recombinant Human Thrombomodulin in Diabetes Mellitus
Source: MDPI journal article supplement (doi:10.3390/cells10092237), 2021-08-29
Supplement: s1 [file s1]

## **Supplementary Materials**

### **Protective Role of Recombinant Human Thrombomodulin in Diabetes Mellitus**

Yuko Okano, Atsuro Takeshita, Taro Yasuma, Masaaki Toda, Kota Nishihama, Valeria Fridman D'Alessandro, Chisa Inoue, Corina N. D'Alessandro-Gabazza, Tetsu Kobayashi, Yutaka Yano, and Esteban C. Gabazza.

**Table S1. Reagents used for flow cytometry analysis**

| Reagents                      | label        | Isotype      | Clone          | source                           |
|-------------------------------|--------------|--------------|----------------|----------------------------------|
| anti-mouse Ly-6G/Ly-6C (Gr-1) | FITC         | rat IgG2bκ   | clone RB6-8C5  | BioLegend, Inc. (San Diego, CA). |
| anti-mouse F4/80              | PE           | rat IgG2bκ   | clone CIA3-1   | BioLegend, Inc. (San Diego, CA). |
| anti-mouse CD11c              | PE/Cy5       | hamster IgG  | clone N418     | BioLegend, Inc. (San Diego, CA). |
| anti-mouse CD3ε               | FITC         | hamster IgG  | clone 145-2C11 | BioLegend, Inc. (San Diego, CA). |
| anti-mouse CD45R/B220         | PE/Cy5       | rat IgG2aκ   | clone RA3-6B2  | BioLegend, Inc. (San Diego, CA). |
| anti-mouse CD25               | FITC         | rat IgG1λ    | clone PC61     | BioLegend, Inc. (San Diego, CA). |
| anti-mouse CD8a               | PE           | rat IgG2aκ   | clone 53-6.7   | BioLegend, Inc. (San Diego, CA). |
| anti-mouse CD4                | PE/Cy5       | rat IgG2bκ   | clone GK1.5    | BioLegend, Inc. (San Diego, CA). |
| anti-mouse NK1.1              | PE           | mouse IgG2aκ | clone PK136    | BioLegend, Inc. (San Diego, CA). |
| FasL                          | biotin       | hamster IgG2 | clone MFL3     | BD Pharmingen (San Jose, CA)     |
| FITC                          | streptavidin |              |                | BD Pharmingen (San Jose, CA)     |
| FITC                          | annexin V    |              |                | BD Pharmingen (San Jose, CA)     |

FITC, fluorescein isothiocyanate; PE, phycoerythrin; PE/Cy5, phycoerythrin/cyanine 5
